# Supplementary material for: Search for a Functional Genetic Variant Mimicking the Effect of SGLT2 Inhibitor Treatment
Source: MDPI journal article supplement (doi:10.3390/genes12081174), 2021-07-29
Supplement: s1 [file s1]

## Supplementary Information

Siqi Wang <sup>1,†</sup>, M. Abdullah Said <sup>1,†</sup>, Hilde E. Groot <sup>1</sup>, Peter J. van der Most <sup>2</sup>, Chris H. L. Thio <sup>2</sup>, Yordi J. van de Vegte <sup>1</sup>, Niek Verweij <sup>1</sup>, Harold Snieder <sup>2</sup> and Pim van der Harst <sup>1,3,\*</sup>

**Table S1.** SNPs located in the *SLC5A2* gene or within 25kb of the 5' and 3' flanking regions. Only SNPs with MAFs>1% were included.

| SNPs             | Chr | Locus      | Minor allele | Major allele       | MAF   |
|------------------|-----|------------|--------------|--------------------|-------|
| rs117947985      | 16  | 31,469,967 | C            | G                  | 0.011 |
| rs117600469      | 16  | 31,470,023 | G            | C                  | 0.015 |
| rs3813002        | 16  | 31,470,540 | T            | C                  | 0.305 |
| rs76210462       | 16  | 31,470,729 | C            | A                  | 0.011 |
| rs151069962      | 16  | 31,470,886 | A            | T                  | 0.064 |
| rs9926717        | 16  | 31,471,378 | G            | A                  | 0.292 |
| rs4889660        | 16  | 31,471,604 | T            | C                  | 0.150 |
| rs35923277       | 16  | 31,473,275 | G            | A                  | 0.045 |
| rs4262961        | 16  | 31,474,418 | A            | G                  | 0.150 |
| rs4362405        | 16  | 31,474,505 | T            | C                  | 0.150 |
| rs11374860       | 16  | 31,475,477 | TG           | T                  | 0.279 |
| rs142376949      | 16  | 31,475,864 | T            | C                  | 0.022 |
| rs55800131       | 16  | 31,476,186 | G            | C                  | 0.093 |
| rs11150624       | 16  | 31,476,458 | T            | C                  | 0.402 |
| rs111510548      | 16  | 31,476,695 | C            | T                  | 0.098 |
| rs142544346      | 16  | 31,478,434 | TGCCTG       | T                  | 0.051 |
| rs13337037       | 16  | 31,478,711 | A            | G                  | 0.275 |
| 16:31479023_CT_C | 16  | 31,479,023 | C            | CT                 | 0.492 |
| rs117392918      | 16  | 31,479,094 | A            | G                  | 0.012 |
| rs4889661        | 16  | 31,479,200 | T            | C                  | 0.402 |
| rs4313820        | 16  | 31,480,318 | G            | C                  | 0.404 |
| rs11150625       | 16  | 31,480,922 | T            | C                  | 0.304 |
| rs117800443      | 16  | 31,482,455 | A            | G                  | 0.066 |
| rs7188278        | 16  | 31,482,749 | T            | C                  | 0.290 |
| rs146241762      | 16  | 31,482,942 | T            | C                  | 0.012 |
| rs11646911       | 16  | 31,483,622 | T            | C                  | 0.402 |
| rs45612043       | 16  | 31,484,598 | C            | A                  | 0.043 |
| rs141227787      | 16  | 31,484,758 | A            | G                  | 0.012 |
| rs117552655      | 16  | 31,485,605 | T            | A                  | 0.023 |
| rs10596          | 16  | 31,488,916 | G            | C                  | 0.402 |
| rs13143          | 16  | 31,489,033 | T            | C                  | 0.278 |
| rs34081766       | 16  | 31,489,741 | A            | C                  | 0.277 |
| rs111332953      | 16  | 31,489,994 | T            | C                  | 0.045 |
| rs1251169601     | 16  | 31,490,046 | C            | CAAAAAAAAAAA<br>AA | 0.410 |
| rs11150626       | 16  | 31,491,982 | C            | T                  | 0.278 |
| rs9924771        | 16  | 31,495,577 | A            | G                  | 0.348 |
| rs11646054       | 16  | 31,495,671 | C            | G                  | 0.402 |
| rs3116149        | 16  | 31,495,726 | A            | G                  | 0.058 |
| rs9934336        | 16  | 31,495,873 | A            | G                  | 0.277 |
| rs3813007        | 16  | 31,497,808 | T            | A                  | 0.013 |

|                             |    |            |           |    |       |
|-----------------------------|----|------------|-----------|----|-------|
| rs3813008                   | 16 | 31,497,881 | A         | G  | 0.154 |
| rs144413428                 | 16 | 31,497,920 | A         | G  | 0.015 |
| rs3116150                   | 16 | 31,498,021 | A         | G  | 0.235 |
| rs71375930                  | 16 | 31,498,364 | TCAAAAA   | T  | 0.399 |
| rs4536493                   | 16 | 31,503,751 | A         | G  | 0.312 |
| rs9927250                   | 16 | 31,506,900 | A         | G  | 0.220 |
| rs112853480                 | 16 | 31,508,833 | C         | T  | 0.016 |
| rs11865835                  | 16 | 31,509,816 | C         | T  | 0.290 |
| rs568998581                 | 16 | 31,510,543 | G         | T  | 0.106 |
| rs79414612                  | 16 | 31,512,564 | A         | C  | 0.063 |
| rs3934739                   | 16 | 31,513,086 | T         | C  | 0.277 |
| rs62053177                  | 16 | 31,513,509 | T         | C  | 0.043 |
| rs117803319                 | 16 | 31,514,762 | A         | G  | 0.011 |
| rs79371355                  | 16 | 31,514,980 | C         | A  | 0.063 |
| rs6565234                   | 16 | 31,515,110 | T         | C  | 0.016 |
| rs4889664                   | 16 | 31,516,210 | T         | C  | 0.395 |
| rs6565235                   | 16 | 31,516,513 | T         | C  | 0.290 |
| rs8062314                   | 16 | 31,516,690 | A         | C  | 0.290 |
| rs6565236                   | 16 | 31,517,648 | T         | A  | 0.278 |
| rs4889665                   | 16 | 31,517,978 | T         | C  | 0.089 |
| rs8047112                   | 16 | 31,518,206 | T         | G  | 0.147 |
| rs6565237                   | 16 | 31,518,348 | T         | C  | 0.465 |
| rs11861164                  | 16 | 31,519,048 | A         | G  | 0.096 |
| rs11866003                  | 16 | 31,519,995 | T         | G  | 0.171 |
| 16:31520375_GT_G            | 16 | 31,520,375 | GT        | G  | 0.470 |
| rs35783178                  | 16 | 31,520,759 | C         | CT | 0.480 |
| rs4889545                   | 16 | 31,521,276 | T         | C  | 0.174 |
| rs4889546                   | 16 | 31,521,334 | A         | G  | 0.099 |
| rs35884660                  | 16 | 31,522,008 | G         | C  | 0.371 |
| rs72790527                  | 16 | 31,522,649 | T         | G  | 0.162 |
| rs7192001                   | 16 | 31,522,723 | T         | C  | 0.470 |
| rs10685036                  | 16 | 31,522,753 | TTA       | T  | 0.359 |
| rs58729087                  | 16 | 31,523,096 | C         | T  | 0.173 |
| rs7187900                   | 16 | 31,523,113 | A         | G  | 0.469 |
| rs4889666                   | 16 | 31,523,412 | C         | A  | 0.371 |
| rs17709110                  | 16 | 31,523,775 | T         | C  | 0.012 |
| rs8050548                   | 16 | 31,523,801 | G         | A  | 0.469 |
| rs9935222                   | 16 | 31,523,926 | A         | C  | 0.354 |
| rs8057326                   | 16 | 31,524,123 | T         | C  | 0.470 |
| rs8057207                   | 16 | 31,524,580 | T         | C  | 0.357 |
| rs8057401                   | 16 | 31,524,685 | T         | C  | 0.356 |
| rs72790535                  | 16 | 31,524,824 | A         | G  | 0.050 |
| 16:31525353_CCCTCCC<br>TT_C | 16 | 31,525,353 | CCCTCCCTT | C  | 0.469 |
| rs8062220                   | 16 | 31,525,774 | G         | T  | 0.469 |
| rs8064191                   | 16 | 31,525,871 | A         | G  | 0.469 |
| rs8062603                   | 16 | 31,525,960 | G         | A  | 0.469 |
| rs9935908                   | 16 | 31,526,534 | T         | C  | 0.469 |
| rs56060924                  | 16 | 31,526,547 | G         | A  | 0.165 |
| 16:31526674_CA_C            | 16 | 31,526,674 | CA        | C  | 0.465 |

|             |    |            |   |             |       |
|-------------|----|------------|---|-------------|-------|
| rs9922901   | 16 | 31,526,823 | G | A           | 0.469 |
| rs111306768 | 16 | 31,526,948 | C | CATGAAAGAAT | 0.475 |

---

Abbreviations: Chr=Chromosome, MAF=Minor allele frequency.

**Table S2.** The association between SNPs and urinary sodium/creatinine ratio (mg/g) in the UK Biobank.

| SNP                         | CHR | Locus      | EFAL            | NEFAL         | Beta   | SE    | P     |
|-----------------------------|-----|------------|-----------------|---------------|--------|-------|-------|
| rs6565235                   | 16  | 31,516,513 | T               | C             | -9.822 | 3.309 | 0.003 |
| rs8062314                   | 16  | 31,516,690 | A               | C             | -9.820 | 3.309 | 0.003 |
| rs7192001                   | 16  | 31,522,723 | C               | T             | -8.708 | 2.970 | 0.003 |
| rs8050548                   | 16  | 31,523,801 | A               | G             | -8.694 | 2.968 | 0.003 |
| rs8057326                   | 16  | 31,524,123 | C               | T             | -8.694 | 2.968 | 0.003 |
| rs7187900                   | 16  | 31,523,113 | G               | A             | -8.678 | 2.968 | 0.003 |
| rs8062220                   | 16  | 31,525,774 | T               | G             | -8.672 | 2.968 | 0.003 |
| rs8064191                   | 16  | 31,525,871 | G               | A             | -8.670 | 2.968 | 0.003 |
| rs8062603                   | 16  | 31,525,960 | A               | G             | -8.667 | 2.968 | 0.003 |
| rs9935908                   | 16  | 31,526,534 | C               | T             | -8.666 | 2.968 | 0.003 |
| rs9922901                   | 16  | 31,526,823 | A               | G             | -8.658 | 2.968 | 0.004 |
| 16:31520375_GT_G            | 16  | 31,520,375 | G               | GT            | -8.636 | 2.969 | 0.004 |
| rs6565237                   | 16  | 31,518,348 | T               | C             | -8.668 | 2.984 | 0.004 |
| rs111306768                 | 16  | 31,526,948 | CATGAA<br>AGAAT | C             | -8.659 | 2.982 | 0.004 |
| rs11865835                  | 16  | 31,509,816 | C               | T             | -9.587 | 3.307 | 0.004 |
| rs6565236                   | 16  | 31,517,648 | T               | A             | -9.587 | 3.310 | 0.004 |
| 16:31525353_CCCTCCCT<br>T_C | 16  | 31,525,353 | C               | CCCTC<br>CCTT | -8.497 | 2.972 | 0.004 |
| 16:31526674_CA_C            | 16  | 31,526,674 | C               | CA            | -8.490 | 2.979 | 0.004 |
| rs35783178                  | 16  | 31,520,759 | CT              | C             | -8.551 | 3.001 | 0.004 |
| rs4889664                   | 16  | 31,516,210 | T               | C             | 8.581  | 3.040 | 0.005 |
| rs3934739                   | 16  | 31,513,086 | T               | C             | -9.333 | 3.308 | 0.005 |
| rs7188278                   | 16  | 31,482,749 | T               | C             | -9.297 | 3.309 | 0.005 |
| rs35884660                  | 16  | 31,522,008 | G               | C             | 8.575  | 3.064 | 0.005 |
| rs4313820                   | 16  | 31,480,318 | G               | C             | 8.487  | 3.035 | 0.005 |
| rs10596                     | 16  | 31,488,916 | G               | C             | 8.450  | 3.034 | 0.005 |
| rs11646054                  | 16  | 31,495,671 | C               | G             | 8.445  | 3.035 | 0.005 |
| rs9934336                   | 16  | 31,495,873 | A               | G             | -9.206 | 3.310 | 0.005 |
| rs10685036                  | 16  | 31,522,753 | TTA             | T             | -8.531 | 3.091 | 0.006 |
| rs11646911                  | 16  | 31,483,622 | T               | C             | 8.356  | 3.033 | 0.006 |
| rs11150626                  | 16  | 31,491,982 | C               | T             | -9.119 | 3.311 | 0.006 |
| rs4889666                   | 16  | 31,523,412 | C               | A             | 8.404  | 3.064 | 0.006 |
| rs71375930                  | 16  | 31,498,364 | TCAAAA<br>A     | T             | 8.295  | 3.045 | 0.006 |
| rs34081766                  | 16  | 31,489,741 | A               | C             | -8.982 | 3.311 | 0.007 |
| rs13143                     | 16  | 31,489,033 | T               | C             | -8.974 | 3.311 | 0.007 |
| rs13337037                  | 16  | 31,478,711 | A               | G             | -8.994 | 3.324 | 0.007 |
| rs4889661                   | 16  | 31,479,200 | T               | C             | 8.201  | 3.033 | 0.007 |
| rs9926717                   | 16  | 31,471,378 | G               | A             | -8.932 | 3.312 | 0.007 |
| rs8057401                   | 16  | 31,524,685 | T               | C             | -8.278 | 3.089 | 0.007 |
| rs9935222                   | 16  | 31,523,926 | A               | C             | -8.276 | 3.090 | 0.007 |
| rs11374860                  | 16  | 31,475,477 | TG              | T             | -8.802 | 3.330 | 0.008 |
| rs8057207                   | 16  | 31,524,580 | T               | C             | -8.104 | 3.089 | 0.009 |
| rs11150624                  | 16  | 31,476,458 | T               | C             | 7.923  | 3.034 | 0.009 |
| rs72790527                  | 16  | 31,522,649 | T               | G             | -9.987 | 3.973 | 0.012 |

Abbreviations: Chr=Chromosome, EFAL=Effect allele, NEFAL=Non-effect allele, SE=standard error.

**Table S3.** The association between SNPs and predicted 24-h urinary sodium excretion (mg/day) in the UK Biobank.

| SNP                         | CHR | Locus      | EFAL            | NEFAL         | Beta   | SE    | P     |
|-----------------------------|-----|------------|-----------------|---------------|--------|-------|-------|
| rs35884660                  | 16  | 31,522,008 | G               | C             | 4.502  | 1.393 | 0.001 |
| rs4889666                   | 16  | 31,523,412 | C               | A             | 4.501  | 1.393 | 0.001 |
| rs4889664                   | 16  | 31,516,210 | T               | C             | 4.411  | 1.381 | 0.001 |
| rs6565237                   | 16  | 31,518,348 | T               | C             | -4.350 | 1.365 | 0.001 |
| rs111306768                 | 16  | 31,526,948 | CATGAA<br>AGAAT | C             | -4.263 | 1.363 | 0.002 |
| 16:31526674_CA_C            | 16  | 31,526,674 | C               | CA            | -4.237 | 1.362 | 0.002 |
| rs7192001                   | 16  | 31,522,723 | C               | T             | -4.221 | 1.358 | 0.002 |
| rs8050548                   | 16  | 31,523,801 | A               | G             | -4.210 | 1.357 | 0.002 |
| rs8057326                   | 16  | 31,524,123 | C               | T             | -4.202 | 1.357 | 0.002 |
| rs7187900                   | 16  | 31,523,113 | G               | A             | -4.199 | 1.357 | 0.002 |
| rs8062220                   | 16  | 31,525,774 | T               | G             | -4.196 | 1.357 | 0.002 |
| rs8064191                   | 16  | 31,525,871 | G               | A             | -4.196 | 1.357 | 0.002 |
| rs9935908                   | 16  | 31,526,534 | C               | T             | -4.194 | 1.357 | 0.002 |
| rs8062603                   | 16  | 31,525,960 | A               | G             | -4.194 | 1.357 | 0.002 |
| rs9922901                   | 16  | 31,526,823 | A               | G             | -4.190 | 1.357 | 0.002 |
| 16:31520375_GT_G            | 16  | 31,520,375 | G               | GT            | -4.177 | 1.357 | 0.002 |
| 16:31525353_CCCTC<br>CCTT_C | 16  | 31,525,353 | C               | CCCTCC<br>CTT | -4.136 | 1.359 | 0.002 |
| rs71375930                  | 16  | 31,498,364 | TCAAAA<br>A     | T             | 4.197  | 1.382 | 0.002 |
| rs35783178                  | 16  | 31,520,759 | CT              | C             | -4.156 | 1.373 | 0.002 |
| rs4313820                   | 16  | 31,480,318 | G               | C             | 4.069  | 1.377 | 0.003 |
| rs10596                     | 16  | 31,488,916 | G               | C             | 4.006  | 1.376 | 0.004 |
| rs11646054                  | 16  | 31,495,671 | C               | G             | 3.998  | 1.377 | 0.004 |
| rs11646911                  | 16  | 31,483,622 | T               | C             | 3.951  | 1.376 | 0.004 |
| rs4889661                   | 16  | 31,479,200 | T               | C             | 3.888  | 1.376 | 0.005 |
| rs6565235                   | 16  | 31,516,513 | T               | C             | -4.211 | 1.520 | 0.006 |
| rs8062314                   | 16  | 31,516,690 | A               | C             | -4.207 | 1.520 | 0.006 |
| rs11150624                  | 16  | 31,476,458 | T               | C             | 3.748  | 1.376 | 0.006 |
| rs6565236                   | 16  | 31,517,648 | T               | A             | -4.135 | 1.520 | 0.007 |
| rs11865835                  | 16  | 31,509,816 | C               | T             | -4.087 | 1.519 | 0.007 |
| rs3934739                   | 16  | 31,513,086 | T               | C             | -4.045 | 1.519 | 0.008 |
| rs9934336                   | 16  | 31,495,873 | A               | G             | -3.841 | 1.520 | 0.012 |

|            |    |            |     |   |        |       |       |
|------------|----|------------|-----|---|--------|-------|-------|
| rs7188278  | 16 | 31,482,749 | T   | C | -3.835 | 1.520 | 0.012 |
| rs11150626 | 16 | 31,491,982 | C   | T | -3.802 | 1.521 | 0.012 |
| rs13337037 | 16 | 31,478,711 | A   | G | -3.806 | 1.527 | 0.013 |
| rs13143    | 16 | 31,489,033 | T   | C | -3.768 | 1.521 | 0.013 |
| rs34081766 | 16 | 31,489,741 | A   | C | -3.743 | 1.521 | 0.014 |
| rs11374860 | 16 | 31,475,477 | TG  | T | -3.742 | 1.530 | 0.014 |
| rs9926717  | 16 | 31,471,378 | G   | A | -3.696 | 1.521 | 0.015 |
| rs10685036 | 16 | 31,522,753 | TTA | T | -3.297 | 1.415 | 0.020 |
| rs9935222  | 16 | 31,523,926 | A   | C | -3.161 | 1.414 | 0.025 |
| rs8057401  | 16 | 31,524,685 | T   | C | -3.143 | 1.414 | 0.026 |
| rs3116150  | 16 | 31,498,021 | A   | G | 3.489  | 1.583 | 0.028 |
| rs8057207  | 16 | 31,524,580 | T   | C | -3.067 | 1.414 | 0.030 |
| rs72790527 | 16 | 31,522,649 | T   | G | -3.575 | 1.813 | 0.049 |

Abbreviations: Chr=Chromosome, EFAL=Effect allele, NEFAL=Non-effect allele, SE=standard error.

**Table S4.** Effects of SNPs on HbA1c and *SLC5A2* gene expression in the TransplantLines cohort.

| SNP         | Chr | Locus      | HbA1c    |                |        |       |          | Gene expression |               |          |       |
|-------------|-----|------------|----------|----------------|--------|-------|----------|-----------------|---------------|----------|-------|
|             |     |            | EF<br>AL | NE<br>EF<br>AL | Beta   | SE    | P        | EF<br>AL        | NE<br>FA<br>L | Estimate | P     |
| rs45612043  | 16  | 31,484,598 | C        | A              | -0.147 | 0.022 | 2.22E-11 | C               | A             | -8.52    | 0.327 |
| rs111510548 | 16  | 31,476,695 | C        | T              | -0.075 | 0.015 | 7.58E-07 | C               | T             | -2.85    | 0.515 |
| rs11865835  | 16  | 31,509,816 | C        | T              | -0.045 | 0.010 | 1.09E-05 | C               | T             | -0.58    | 0.831 |
| rs8062314   | 16  | 31,516,690 | A        | C              | -0.045 | 0.010 | 1.11E-05 | A               | C             | -0.58    | 0.831 |
| rs6565235   | 16  | 31,516,513 | T        | C              | -0.045 | 0.010 | 1.20E-05 | T               | C             | -0.58    | 0.831 |
| rs6565236   | 16  | 31,517,648 | T        | A              | -0.044 | 0.010 | 1.23E-05 | T               | A             | -0.54    | 0.842 |
| rs9926717   | 16  | 31,471,378 | G        | A              | -0.044 | 0.010 | 1.40E-05 | G               | A             | -0.23    | 0.934 |
| rs144413428 | 16  | 31,497,920 | A        | G              | 0.159  | 0.037 | 1.47E-05 | A               | G             | 10.08    | 0.265 |
| rs13337037  | 16  | 31,478,711 | A        | G              | -0.044 | 0.010 | 1.56E-05 | A               | G             | -0.64    | 0.811 |
| rs7188278   | 16  | 31,482,749 | T        | C              | -0.044 | 0.010 | 1.56E-05 | T               | C             | -0.54    | 0.841 |
| rs3934739   | 16  | 31,513,086 | T        | C              | -0.044 | 0.010 | 1.56E-05 | T               | C             | -0.61    | 0.820 |
| rs11150626  | 16  | 31,491,982 | C        | T              | -0.043 | 0.010 | 2.06E-05 | C               | T             | -0.54    | 0.841 |
| rs9934336   | 16  | 31,495,873 | A        | G              | -0.043 | 0.010 | 2.11E-05 | A               | G             | -0.62    | 0.816 |
| rs34081766  | 16  | 31,489,741 | A        | C              | -0.043 | 0.010 | 2.27E-05 | A               | C             | -0.54    | 0.841 |
| rs13143     | 16  | 31,489,033 | T        | C              | -0.043 | 0.010 | 2.27E-05 | T               | C             | -0.54    | 0.841 |
| rs9927250   | 16  | 31,506,900 | G        | A              | -0.044 | 0.011 | 6.61E-05 | G               | A             | -2.00    | 0.468 |
| rs8057207   | 16  | 31,524,580 | T        | C              | -0.037 | 0.010 | 8.26E-05 | T               | C             | 0.56     | 0.820 |
| rs112853480 | 16  | 31,508,833 | C        | T              | 0.148  | 0.038 | 8.71E-05 | C               | T             | 9.46     | 0.340 |
| rs8057401   | 16  | 31,524,685 | T        | C              | -0.037 | 0.010 | 1.14E-04 | T               | C             | 0.59     | 0.811 |
| rs9935222   | 16  | 31,523,926 | A        | C              | -0.037 | 0.010 | 1.19E-04 | A               | C             | 0.53     | 0.829 |
| rs3116150   | 16  | 31,498,021 | A        | G              | 0.041  | 0.011 | 1.24E-04 | A               | G             | -2.20    | 0.454 |
| rs4536493   | 16  | 31,503,751 | G        | A              | -0.037 | 0.010 | 1.65E-04 | G               | A             | -2.22    | 0.351 |
| rs117800443 | 16  | 31,482,455 | A        | G              | 0.070  | 0.019 | 1.80E-04 | A               | G             | 3.68     | 0.545 |

Abbreviations: Chr=Chromosome, EFAL=Effect allele, NEFAL=Non-effect allele, SE=standard error.

**Table S5.** Effects of SNPs on HbA1c and *SLC5A2* gene expression in the NephQTL resource.

| SNP         | Chr | Locus      | HbA1c    |               |        |       |          | Gene Expression |               |        |       |       |               |
|-------------|-----|------------|----------|---------------|--------|-------|----------|-----------------|---------------|--------|-------|-------|---------------|
|             |     |            | EF<br>AL | NE<br>FA<br>L | Beta   | SE    | P        | EF<br>AL        | NE<br>FA<br>L | Beta   | SE    | P     | Symbol        |
| rs45612043  | 16  | 31,484,598 | C        | A             | -0.147 | 0.022 | 2.22E-11 | C               | A             | 0.012  | 0.171 | 0.943 | <i>SLC5A2</i> |
| rs9924771   | 16  | 31,495,577 | G        | A             | -0.049 | 0.010 | 6.53E-07 | G               | A             | -0.039 | 0.073 | 0.597 | <i>SLC5A2</i> |
| rs111510548 | 16  | 31,476,695 | C        | T             | -0.075 | 0.015 | 7.58E-07 | C               | T             | 0.100  | 0.124 | 0.423 | <i>SLC5A2</i> |
| rs11374860  | 16  | 31,475,477 | TG       | T             | -0.046 | 0.010 | 7.80E-06 | TG              | T             | 0.007  | 0.072 | 0.926 | <i>SLC5A2</i> |
| rs11865835  | 16  | 31,509,816 | C        | T             | -0.045 | 0.010 | 1.09E-05 | C               | T             | 0.021  | 0.070 | 0.766 | <i>SLC5A2</i> |
| rs8062314   | 16  | 31,516,690 | A        | C             | -0.045 | 0.010 | 1.11E-05 | A               | C             | 0.028  | 0.071 | 0.692 | <i>SLC5A2</i> |
| rs6565235   | 16  | 31,516,513 | T        | C             | -0.045 | 0.010 | 1.20E-05 | T               | C             | 0.021  | 0.070 | 0.766 | <i>SLC5A2</i> |
| rs6565236   | 16  | 31,517,648 | T        | A             | -0.044 | 0.010 | 1.23E-05 | T               | A             | 0.013  | 0.072 | 0.859 | <i>SLC5A2</i> |
| rs9926717   | 16  | 31,471,378 | G        | A             | -0.044 | 0.010 | 1.40E-05 | G               | A             | 0.012  | 0.069 | 0.862 | <i>SLC5A2</i> |
| rs13337037  | 16  | 31,478,711 | A        | G             | -0.044 | 0.010 | 1.56E-05 | A               | G             | 0.020  | 0.071 | 0.783 | <i>SLC5A2</i> |
| rs7188278   | 16  | 31,482,749 | T        | C             | -0.044 | 0.010 | 1.56E-05 | T               | C             | 0.021  | 0.070 | 0.764 | <i>SLC5A2</i> |
| rs3934739   | 16  | 31,513,086 | T        | C             | -0.044 | 0.010 | 1.56E-05 | T               | C             | 0.026  | 0.072 | 0.714 | <i>SLC5A2</i> |
| rs11150626  | 16  | 31,491,982 | C        | T             | -0.043 | 0.010 | 2.06E-05 | C               | T             | 0.005  | 0.071 | 0.948 | <i>SLC5A2</i> |
| rs9934336   | 16  | 31,495,873 | A        | G             | -0.043 | 0.010 | 2.11E-05 | A               | G             | 0.029  | 0.072 | 0.684 | <i>SLC5A2</i> |
| rs34081766  | 16  | 31,489,741 | A        | C             | -0.043 | 0.010 | 2.27E-05 | A               | C             | 0.021  | 0.072 | 0.770 | <i>SLC5A2</i> |
| rs13143     | 16  | 31,489,033 | T        | C             | -0.043 | 0.010 | 2.27E-05 | T               | C             | 0.018  | 0.072 | 0.798 | <i>SLC5A2</i> |
| rs9927250   | 16  | 31,506,900 | G        | A             | -0.044 | 0.011 | 6.61E-05 | G               | A             | 0.042  | 0.088 | 0.636 | <i>SLC5A2</i> |
| rs8057207   | 16  | 31,524,580 | T        | C             | -0.037 | 0.010 | 8.26E-05 | T               | C             | 0.068  | 0.069 | 0.324 | <i>SLC5A2</i> |
| rs10685036  | 16  | 31,522,753 | TT<br>A  | T             | -0.037 | 0.010 | 1.10E-04 | TT<br>A         | T             | 0.043  | 0.071 | 0.548 | <i>SLC5A2</i> |
| rs8057401   | 16  | 31,524,685 | T        | C             | -0.037 | 0.010 | 1.14E-04 | T               | C             | 0.047  | 0.069 | 0.496 | <i>SLC5A2</i> |
| rs9935222   | 16  | 31,523,926 | A        | C             | -0.037 | 0.010 | 1.19E-04 | A               | C             | 0.036  | 0.071 | 0.614 | <i>SLC5A2</i> |
| rs3116150   | 16  | 31,498,021 | A        | G             | 0.041  | 0.011 | 1.24E-04 | A               | G             | 0.023  | 0.081 | 0.777 | <i>SLC5A2</i> |
| rs4536493   | 16  | 31,503,751 | G        | A             | -0.037 | 0.010 | 1.65E-04 | G               | A             | 0.029  | 0.074 | 0.701 | <i>SLC5A2</i> |
| rs117800443 | 16  | 31,482,455 | A        | G             | 0.070  | 0.019 | 1.80E-04 | A               | G             | -0.053 | 0.171 | 0.757 | <i>SLC5A2</i> |

Abbreviations: Chr=Chromosome, EFAL=Effect allele, NEFAL=Non-effect allele, SE=standard error.

**Table S6.** Effects of SNPs on HbA1c and *SLC5A2* gene expression in the eQTLGen consortium.

| SNP         | Chr | Locus      | HbA1c    |               |        |       |          | Expression (eQTL) |               |         |          |               |
|-------------|-----|------------|----------|---------------|--------|-------|----------|-------------------|---------------|---------|----------|---------------|
|             |     |            | EF<br>AL | NE<br>FA<br>L | Beta   | SE    | P        | EF<br>AL          | NE<br>FA<br>L | Z-score | P        | Symbol        |
| rs45612043  | 16  | 31,484,598 | C        | A             | -0.147 | 0.022 | 2.22E-11 | C                 | A             | -19.053 | 0.057    | <i>SLC5A2</i> |
| rs9924771   | 16  | 31,495,577 | G        | A             | -0.049 | 0.010 | 6.53E-07 | A                 | G             | -22.985 | 0.022    | <i>SLC5A2</i> |
| rs111510548 | 16  | 31,476,695 | C        | T             | -0.075 | 0.015 | 7.58E-07 | C                 | T             | 5.199   | 2.00E-07 | <i>SLC5A2</i> |
| rs11865835  | 16  | 31,509,816 | C        | T             | -0.045 | 0.010 | 1.09E-05 | C                 | T             | 5.736   | 9.69E-09 | <i>SLC5A2</i> |
| rs8062314   | 16  | 31,516,690 | A        | C             | -0.045 | 0.010 | 1.11E-05 | A                 | C             | 5.727   | 1.02E-08 | <i>SLC5A2</i> |
| rs6565235   | 16  | 31,516,513 | T        | C             | -0.045 | 0.010 | 1.20E-05 | T                 | C             | 5.746   | 9.15E-09 | <i>SLC5A2</i> |
| rs6565236   | 16  | 31,517,648 | T        | A             | -0.044 | 0.010 | 1.23E-05 | T                 | A             | 6.112   | 9.86E-10 | <i>SLC5A2</i> |
| rs9926717   | 16  | 31,471,378 | G        | A             | -0.044 | 0.010 | 1.40E-05 | G                 | A             | 5.481   | 4.22E-08 | <i>SLC5A2</i> |
| rs144413428 | 16  | 31,497,920 | A        | G             | 0.159  | 0.037 | 1.47E-05 | A                 | G             | -0.784  | 0.433    | <i>SLC5A2</i> |
| rs13337037  | 16  | 31,478,711 | A        | G             | -0.044 | 0.010 | 1.56E-05 | A                 | G             | 5.912   | 3.39E-09 | <i>SLC5A2</i> |
| rs7188278   | 16  | 31,482,749 | T        | C             | -0.044 | 0.010 | 1.56E-05 | T                 | C             | 5.478   | 4.31E-08 | <i>SLC5A2</i> |
| rs3934739   | 16  | 31,513,086 | T        | C             | -0.044 | 0.010 | 1.56E-05 | T                 | C             | 6.073   | 1.25E-09 | <i>SLC5A2</i> |
| rs11150626  | 16  | 31,491,982 | C        | T             | -0.043 | 0.010 | 2.06E-05 | C                 | T             | 5.980   | 2.23E-09 | <i>SLC5A2</i> |
| rs9934336   | 16  | 31,495,873 | A        | G             | -0.043 | 0.010 | 2.11E-05 | A                 | G             | 5.959   | 2.54E-09 | <i>SLC5A2</i> |
| rs34081766  | 16  | 31,489,741 | A        | C             | -0.043 | 0.010 | 2.27E-05 | A                 | C             | 5.968   | 2.40E-09 | <i>SLC5A2</i> |
| rs13143     | 16  | 31,489,033 | T        | C             | -0.043 | 0.010 | 2.27E-05 | T                 | C             | 6.060   | 1.36E-09 | <i>SLC5A2</i> |
| rs9927250   | 16  | 31,506,900 | G        | A             | -0.044 | 0.011 | 6.61E-05 | A                 | G             | -2.083  | 0.037    | <i>SLC5A2</i> |
| rs8057207   | 16  | 31,524,580 | T        | C             | -0.037 | 0.010 | 8.26E-05 | T                 | C             | 5.090   | 3.58E-07 | <i>SLC5A2</i> |
| rs112853480 | 16  | 31,508,833 | C        | T             | 0.148  | 0.038 | 8.71E-05 | C                 | T             | 0.218   | 0.828    | <i>SLC5A2</i> |
| rs8057401   | 16  | 31,524,685 | T        | C             | -0.037 | 0.010 | 1.14E-04 | T                 | C             | 4.995   | 5.88E-07 | <i>SLC5A2</i> |
| rs9935222   | 16  | 31,523,926 | A        | C             | -0.037 | 0.010 | 1.19E-04 | A                 | C             | 5.102   | 3.36E-07 | <i>SLC5A2</i> |
| rs3116150   | 16  | 31,498,021 | A        | G             | 0.041  | 0.011 | 1.24E-04 | A                 | G             | -13.166 | 0.188    | <i>SLC5A2</i> |
| rs4536493   | 16  | 31,503,751 | G        | A             | -0.037 | 0.010 | 1.65E-04 | A                 | G             | -3.006  | 0.003    | <i>SLC5A2</i> |
| rs117800443 | 16  | 31,482,455 | A        | G             | 0.070  | 0.019 | 1.80E-04 | A                 | G             | -17.393 | 0.082    | <i>SLC5A2</i> |

Abbreviations: Chr=Chromosome, EFAL=Effect allele, NEFAL=Non-effect allele, SE=standard error.

**Table S7.** CADD score for SNPs significantly associated with HbA1c in UK Biobank.

| SNP          | Chr | Locus      | Alternative allele | Reference allele | Symbol                 | CADD PHRED scaled score |
|--------------|-----|------------|--------------------|------------------|------------------------|-------------------------|
| rs9926717    | 16  | 31,471,378 | G                  | A                | <i>ARMC5</i>           | 8.528                   |
| rs11374860   | 16  | 31,475,477 | G                  | T                | <i>ARMC5</i>           | 0.020                   |
| rs111510548  | 16  | 31,476,695 | C                  | T                | <i>ARMC5</i>           | 4.538                   |
| rs13337037   | 16  | 31,478,711 | A                  | G                | <i>ARMC5/TGFB1I1</i>   | 8.756                   |
| rs117800443  | 16  | 31,482,455 | A                  | G                | <i>ARMC5/TGFB1I1</i>   | 3.153                   |
| rs7188278    | 16  | 31,482,749 | T                  | C                | <i>ARMC5/TGFB1I1</i>   | 10.84                   |
| rs45612043   | 16  | 31,484,598 | C                  | A                | <i>TGFB1I1</i>         | 12.79                   |
| rs13143      | 16  | 31,489,033 | T                  | C                | <i>TGFB1I1</i>         | 6.091                   |
| rs34081766   | 16  | 31,489,741 | A                  | C                | <i>SLC5A2/TGFB1I1</i>  | 0.228                   |
| rs1251169601 | 16  | 31,490,046 | A                  | C                | <i>SLC5A2/TGFB1I1</i>  | 0.954                   |
| rs11150626   | 16  | 31,491,982 | C                  | T                | <i>SLC5A2/TGFB1I1</i>  | 5.413                   |
| rs9924771    | 16  | 31,495,577 | G                  | A                | <i>SLC5A2</i>          | 1.858                   |
| rs9934336    | 16  | 31,495,873 | A                  | G                | <i>SLC5A2/C16orf58</i> | 2.596                   |
| rs144413428  | 16  | 31,497,920 | A                  | G                | <i>SLC5A2/C16orf58</i> | 3.927                   |
| rs3116150    | 16  | 31,498,021 | A                  | G                | <i>SLC5A2/C16orf58</i> | 4.732                   |
| rs4536493    | 16  | 31,503,751 | G                  | A                | <i>SLC5A2/C16orf58</i> | 5.674                   |
| rs9927250    | 16  | 31,506,900 | G                  | A                | <i>SLC5A2/C16orf58</i> | 6.287                   |
| rs112853480  | 16  | 31,508,833 | C                  | T                | <i>C16orf58</i>        | 3.369                   |
| rs11865835   | 16  | 31,509,816 | C                  | T                | <i>C16orf58</i>        | 0.273                   |
| rs3934739    | 16  | 31,513,086 | T                  | C                | <i>C16orf58</i>        | 2.832                   |
| rs6565235    | 16  | 31,516,513 | T                  | C                | <i>C16orf58</i>        | 1.866                   |
| rs8062314    | 16  | 31,516,690 | A                  | C                | <i>C16orf58</i>        | 3.146                   |
| rs6565236    | 16  | 31,517,648 | T                  | A                | <i>C16orf58</i>        | 0.225                   |
| rs10685036   | 16  | 31,522,753 | A                  | T                | <i>C16orf58</i>        | 7.636                   |
| rs9935222    | 16  | 31,523,926 | A                  | C                | <i>C16orf58</i>        | 1.258                   |
| rs8057207    | 16  | 31,524,580 | T                  | C                | <i>C16orf58</i>        | 0.034                   |
| rs8057401    | 16  | 31,524,685 | T                  | C                | <i>C16orf58</i>        | 5.330                   |

Abbreviations: Chr=Chromosome.

Figure S1. *SLC5A2* gene expression in various tissues.

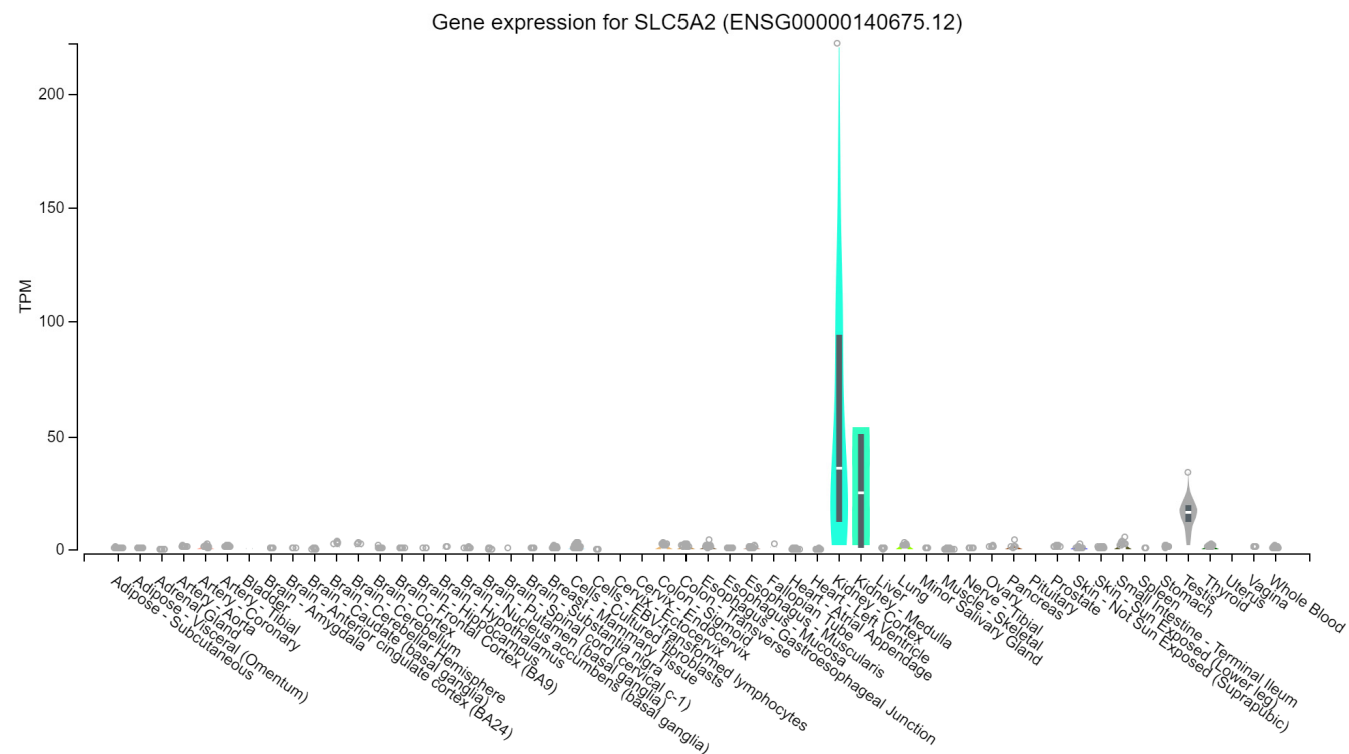

*SLC5A2* gene expression in different tissue types. The graph was generated by the Genotype-Tissue Expression (GTEx) Portal on 14/04/2020. (TPM=transcripts per million)

**Figure S2. Genetic correlation of the 25 SNPs which significantly associated with HbA1c in UK Biobank**

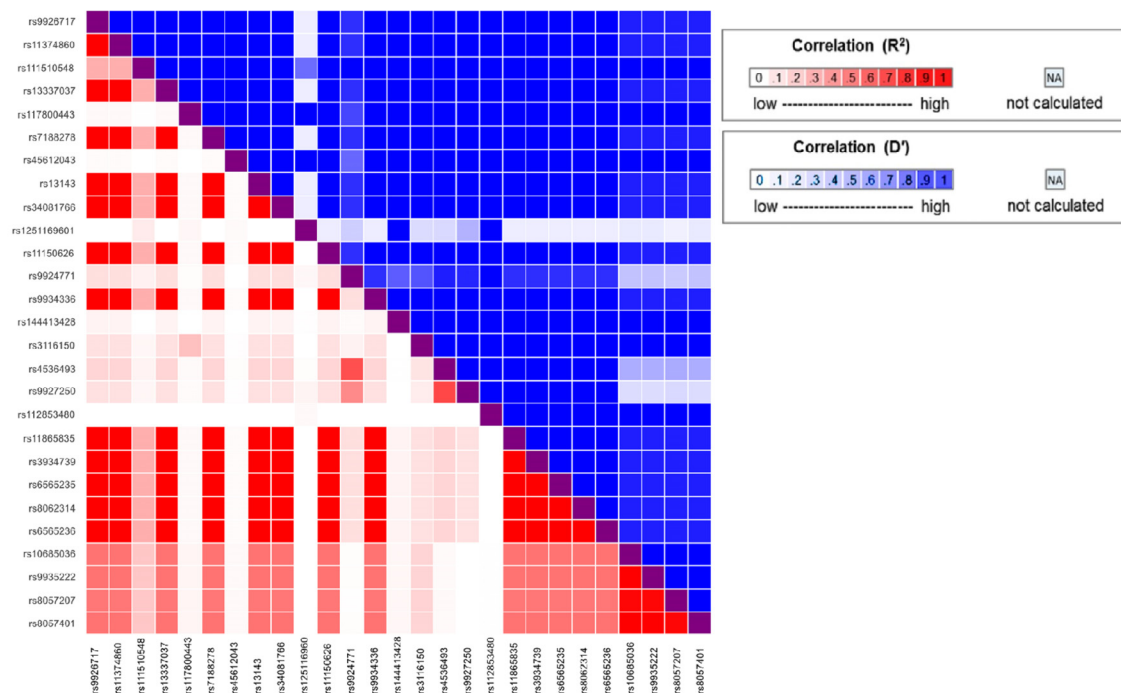

Shown are the pairwise linkage disequilibrium statistics results ( $r^2$  in red and  $D'$  in blue). This interactive heatmap matrix was generated by using LDmatrix Tool of LDlink.
